# Supplementary material
Source: publisher site journal article supplement (https://www.dovepress.com/article/432249)
Supplement: Supplementary file 1 [file get_supplementary_file.php]

**Supplementary Table 1** Searching strategy

| **Database** | **Keywords** | **Hits** |
| --- | --- | --- |
| Pubmed | ("Virtual Reality" OR VR OR "active video game" OR Exergame OR AVG) AND (Cerebral Palsy [MeSH] OR "cerebral palsies" OR "Little disease" OR "infantile palsies" OR "spastic diplegia" OR "spastic diplegias" OR "spastic hemiplegia" OR "spastic quadriplegia") | 162 |
| Embase | ("Virtual Reality" OR VR OR "active video game" OR Exergame OR AVG) AND (Cerebral Palsy OR "cerebral palsies" OR "Little disease" OR "infantile palsies" OR "spastic diplegia" OR "spastic diplegias" OR "spastic hemiplegia" OR "spastic quadriplegia") | 498 |
| Scopus | ( ( "Virtual Reality" OR vr OR "active video game" OR exergame OR avg ) AND ( cerebral AND palsy AND [mesh] OR "cerebral palsies" OR "Little disease" OR "infantile palsies" OR "spastic diplegia" OR "spastic diplegias" OR "spastic hemiplegia" OR "spastic quadriplegia" ) ) | 493 |
| Wiley | ("Virtual Reality" OR VR OR "active video game" OR Exergame OR AVG) AND (Cerebral Palsy OR "cerebral palsies" OR "Little disease" OR "infantile palsies" OR "spastic diplegia" OR "spastic diplegias" OR "spastic hemiplegia" OR "spastic quadriplegia") | 1577 |
| Proquest | (“Virtual Reality” OR VR OR “active video game” OR Exergame OR AVG) AND  (Cerebral Palsy [MeSH] OR “cerebral palsies” OR “Little disease” OR “infantile palsies” OR “spastic diplegia” OR “spastic diplegias” OR “spastic hemiplegia” OR “spastic quadriplegia”) | 577 |
